# Supplementary material
Source: PubMed Central journal article supplement (PMC4495221)
Supplement: AEM.00563-15_zam999116412so1.pdf [file AEM.00563-15_zam999116412so1.pdf]

**Supporting Information: AEM-00563-15**  
**Wastewater analysis indicates that genetically diverse astroviruses, including strains belonging to novel clades MLB and VA, are circulating within Japanese populations.**

Akihiko Hata,<sup>1\*</sup> Hiroyuki Katayama,<sup>2</sup> Masaaki Kitajima<sup>3</sup>, and Hiroaki Furumai<sup>2</sup>

<sup>1</sup>*Research Center for Environmental Quality Management, Kyoto University, 1-2 Yumihama, Otsu, Shiga 520-0811, Japan*

<sup>2</sup>*Department of Urban Engineering, Graduate School of Engineering, The University of Tokyo, 7-3-1 Hongo, Bunkyo-ku, Tokyo 113-8656, Japan*

<sup>3</sup>*Center for Environmental Sensing and Modeling, Singapore-MIT Alliance for Research and Technology, 1 CREATE Way, Singapore 138602, Singapore*

**\*Corresponding author:** Akihiko Hata

**Mailing address:** *Research Center for Environmental Quality Management, Kyoto University, 1-2 Yumihama, Otsu, Shiga 520-0811, Japan*

**Tel:** +81-77-527-6439 **Fax:** +81-77-524-9869

**E-mail:** hata.akhiko.33c@st.kyoto-u.ac.jp

**Running title:** Detection of astroviruses in wastewater

## SUPPORTING FIGURES

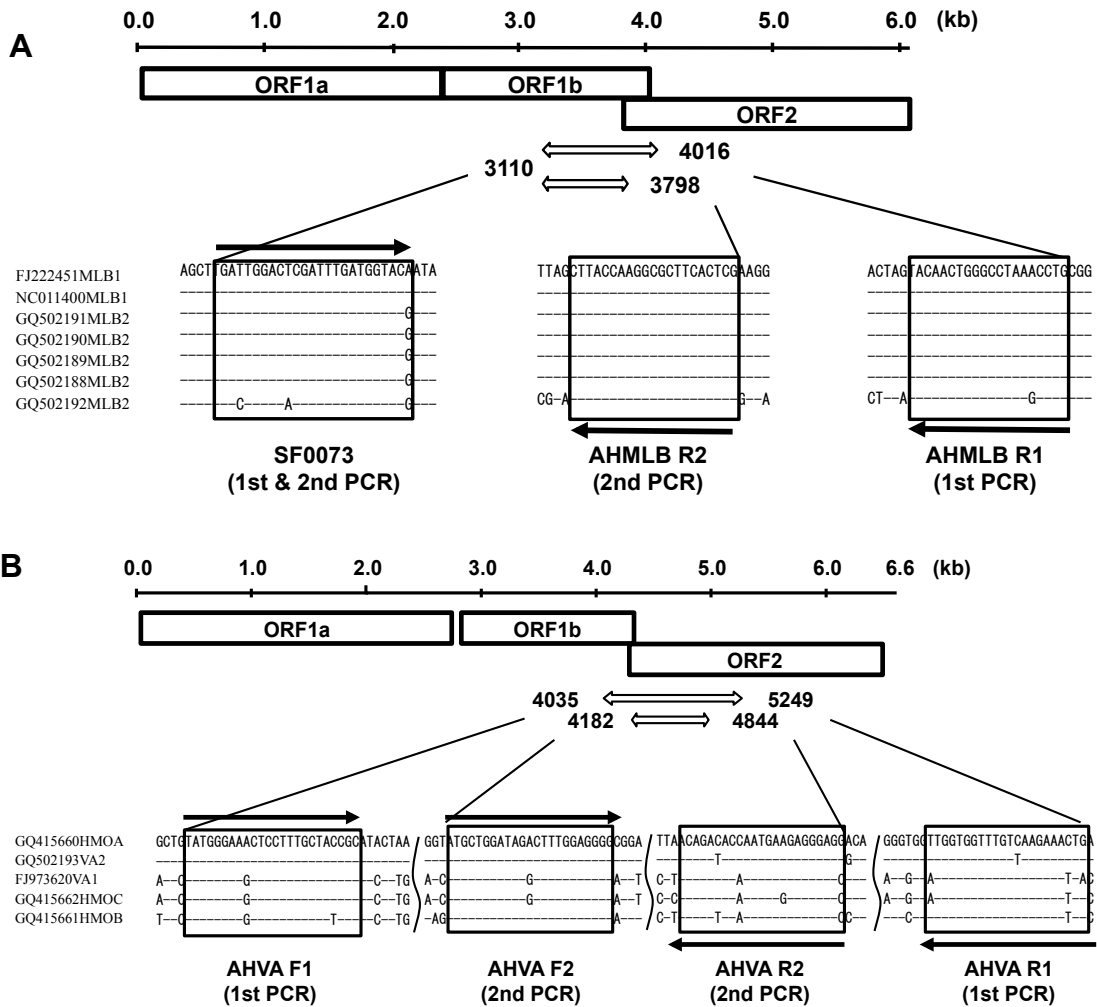

**Fig. S1** Alignment of nucleotide sequences of partial ORF1b–ORF2 junction region of MLB- and VA(HMO)-AstV genotypes (Fig. S1 A and B, respectively). Primer binding sites (SF0073, AHMLB R1, and AHMLB R2 for MLB-AstVs and AHVA F1, AHVA F2, AHVA R1, and AHVA R2 for VA- AstVs) are indicated with arrows. Numbers indicate nucleotide positions corresponding to MLB-AstV-1 and VA-AstV-1 (GenBank accession number: FJ222451 and FJ973620, respectively).

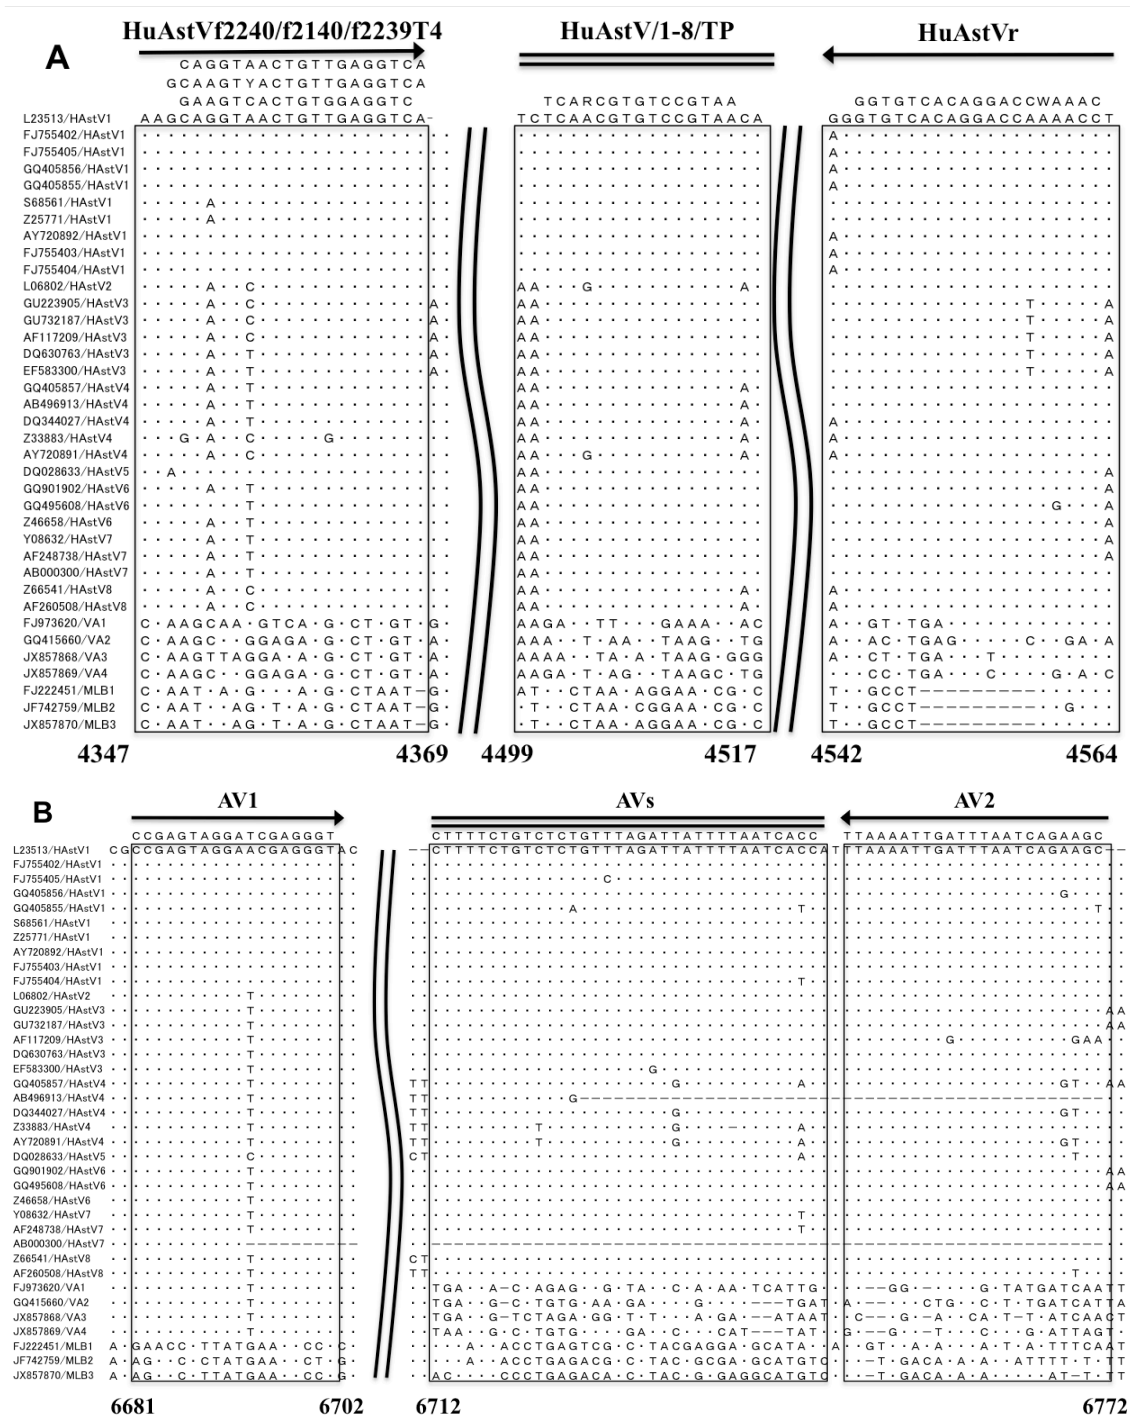

FIG. S2. Primers and TaqMan probe designed by Yokoi and Kitahashi (1) (A) and Le Cann et al. (2) (B) targeting the 5'- end and the 3'-end of ORF 2 region, respectively. Alignment of HAstV nucleotide sequences including complete ORF 2 region in GenBank database are selected and shown. Numbers shown at the bottom of the figures indicate nucleotide positions corresponding to HAstV-1 Oxford strain (GenBank accession number: L23513).

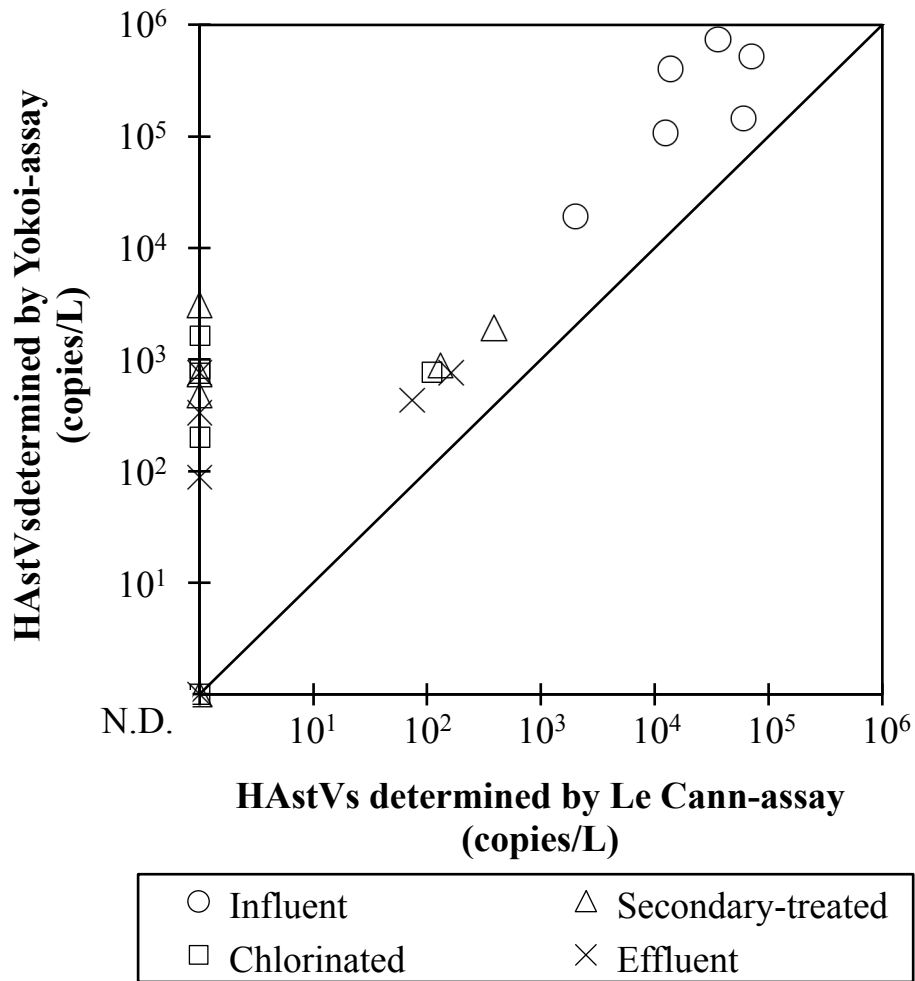

**Fig. S3** Comparison of HAstVs concentrations in wastewater samples determined by RT-qPCR assays targeting the 5'-end of ORF2 (Yokoi-assay: Yokoi and Kitahashi, 2009 (1)) to the 3'-end of ORF2 (Le Cann-assay: Le Cann et al., 2002 (2)). "N.D." on x and y axes indicates "not detected".

## SUPPORTING TABLE

**TABLE S1** Description of the WWTP investigated.

|                                                  |         |
|--------------------------------------------------|---------|
| Service population (person)                      | 781,000 |
| Treatment capacity (m <sup>3</sup> /day)         | 450,000 |
| Hydraulic retention time (h)                     | 9.3     |
| Biochemical oxygen demand in the influent (mg/L) | 220     |
| Biochemical oxygen demand in the effluent (mg/L) | 1       |

**TABLE S2** Recovery efficiency of spiked MNV by RT-qPCR (%).

| <b>Month (2007-2008)</b> | <b>Influent</b> | <b>Secondary-treated</b> | <b>Chlorinated</b> | <b>Effluent</b> |
|--------------------------|-----------------|--------------------------|--------------------|-----------------|
| <b>October</b>           | 102             | 62                       | 65                 | 100             |
| <b>December</b>          | 130             | 52                       | 54                 | 137             |
| <b>November</b>          | 127             | 59                       | 46                 | 85              |
| <b>January</b>           | 110             | 60                       | 30                 | 49              |
| <b>February</b>          | 119             | 49                       | 64                 | 57              |
| <b>March</b>             | 99              | 87                       | 52                 | 71              |

## REFERENCES

1. **Yokoi, H., and T. Kitahashi.** 2009. Astrovirus RNA Detection Using Real-Time Reverse Transcription-Polymerase Chain Reaction. *J. Jpn. Assoc. Inf. Dis.* **83(2)**:120-126. [in Japanese]
2. **Le Cann, P., S. Ranarijaona, S. Monpoeho, F. Le Guyader, and V. Ferré.** 2004. Quantification of human astroviruses in sewage using real-time RT-PCR. *Res Microbiol.* **155(1)**:11-15.
